# Supplementary material for: Fabrication of a novel tin gas diffusion electrode for electrochemical reduction of carbon dioxide to formic acid
Source: Royal Society of Chemistry journal article supplement (doi:10.1039/c4ra10775f), 2014-10-29
Supplement: c4ra10775f1.pdf [file c4ra10775f1.pdf]

1

**- Supplementary Information -**

2 **Fabrication of a Novel Tin Gas Diffusion Electrode for**

3 **Electrochemical Reduction of Carbon Dioxide to Formic Acid**

4 Qinian Wang, Heng Dong\*, Hongbing Yu\*

5 College of Environmental Science and Engineering, Nankai University, No. 94 Weijin

6 Road, Nankai District, Tianjin 300071, China

7 \*Corresponding Authors; Phone: (86)22-23502756; Fax: (86)22-23502756; E-mail:

8 dongheng@nankai.edu.cn; hongbingyu1130@sina.com.

9

10

11

12

13

14

15

16

17

18

19

20

21

22

23

24 **Table S1** Simulated data of equivalent circuits for the Nyquist plots of the SGDEs  
 25 with different Sn loadings.

| Element       | 3 mg cm <sup>-2</sup> | 5 mg cm <sup>-2</sup> | 7 mg cm <sup>-2</sup> | 9 mg cm <sup>-2</sup> |
|---------------|-----------------------|-----------------------|-----------------------|-----------------------|
| $R_s(\Omega)$ | 1.459                 | 1.392                 | 1.290                 | 1.440                 |
| $R_1(\Omega)$ | 1.241                 | 1.255                 | 1.222                 | 1.246                 |
| $R_2(\Omega)$ | 7.588                 | 7.078                 | 6.453                 | 6.724                 |

26 **Table S2** Simulated data of equivalent circuits for the Nyquist plots of the SGDEs  
 27 with different Nafion fractions.

| Element       | 20 wt% | 33 wt% | 50 wt% | 60wt% |
|---------------|--------|--------|--------|-------|
| $R_s(\Omega)$ | 1.438  | 1.278  | 1.392  | 1.262 |
| $R_1(\Omega)$ | 1.381  | 0.990  | 1.255  | 1.052 |
| $R_2(\Omega)$ | 8.522  | 7.654  | 7.078  | 4.649 |

28

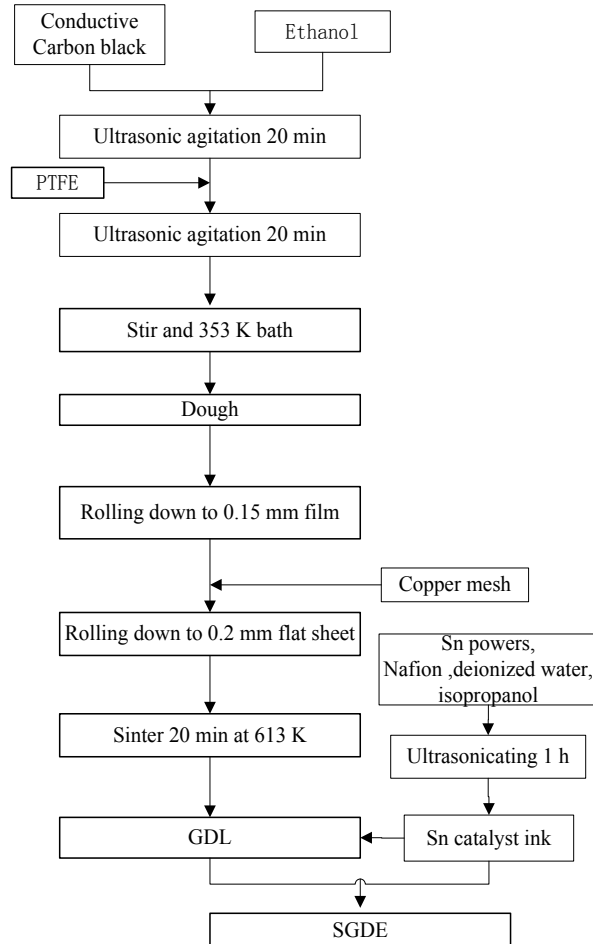

29

30 **Figure S1** Fabrication procedure of the SGDE.

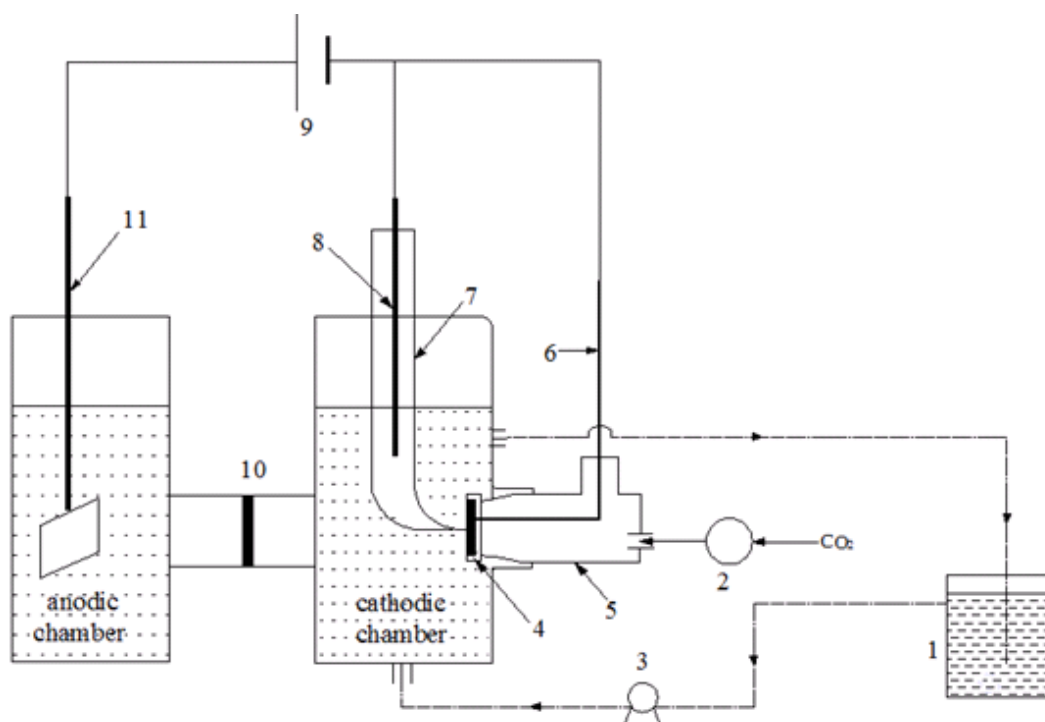

- 31  
 32 1 Electrolyte, 2 Flowmeter, 3 Pump, 4 Working electrode (SGDE), 5 Gas chamber, 6 Titanium wire, 7  
 33 Luggin capillary, 8 Ag/AgCl electrode, 9 Electrochemical workstation, 10 PEM, 11 Counter electrode.

34 **Figure S2** Schematic overview of the three-compartment electrochemical cell.

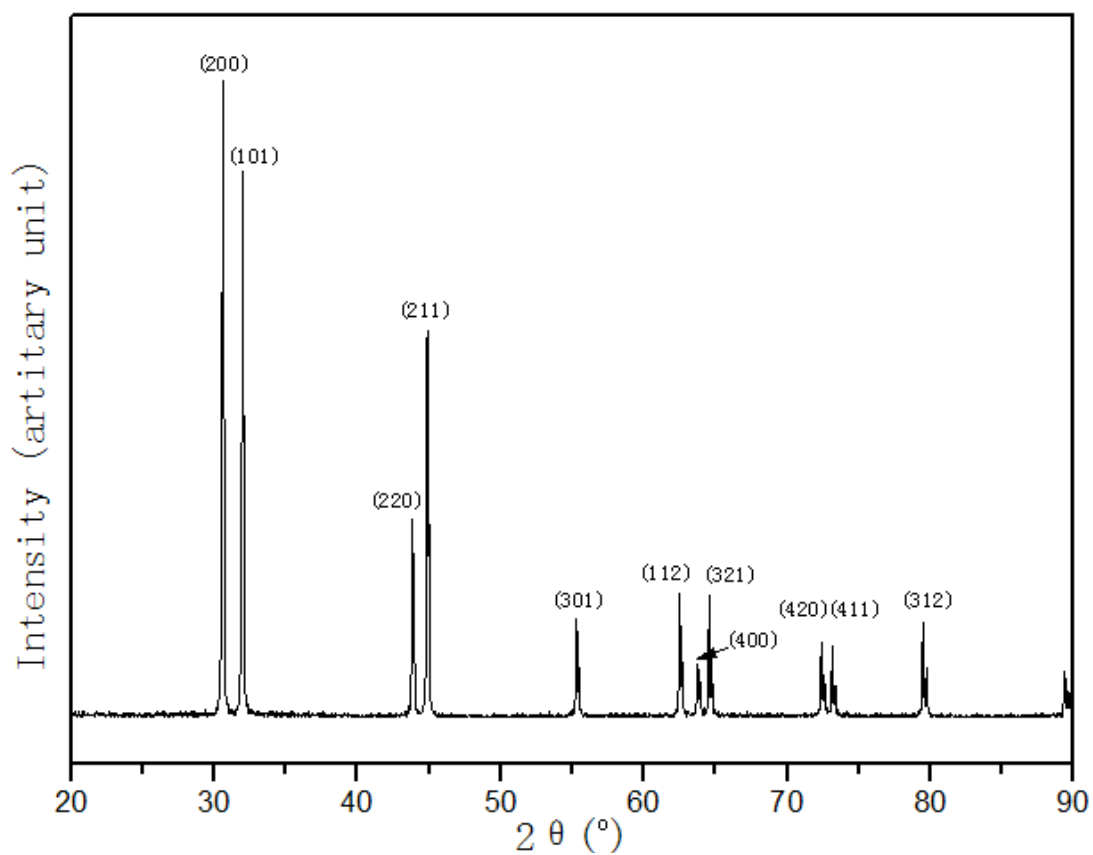

- 35  
 36 **Figure S3** XRD pattern of the as-prepared catalyst particles.

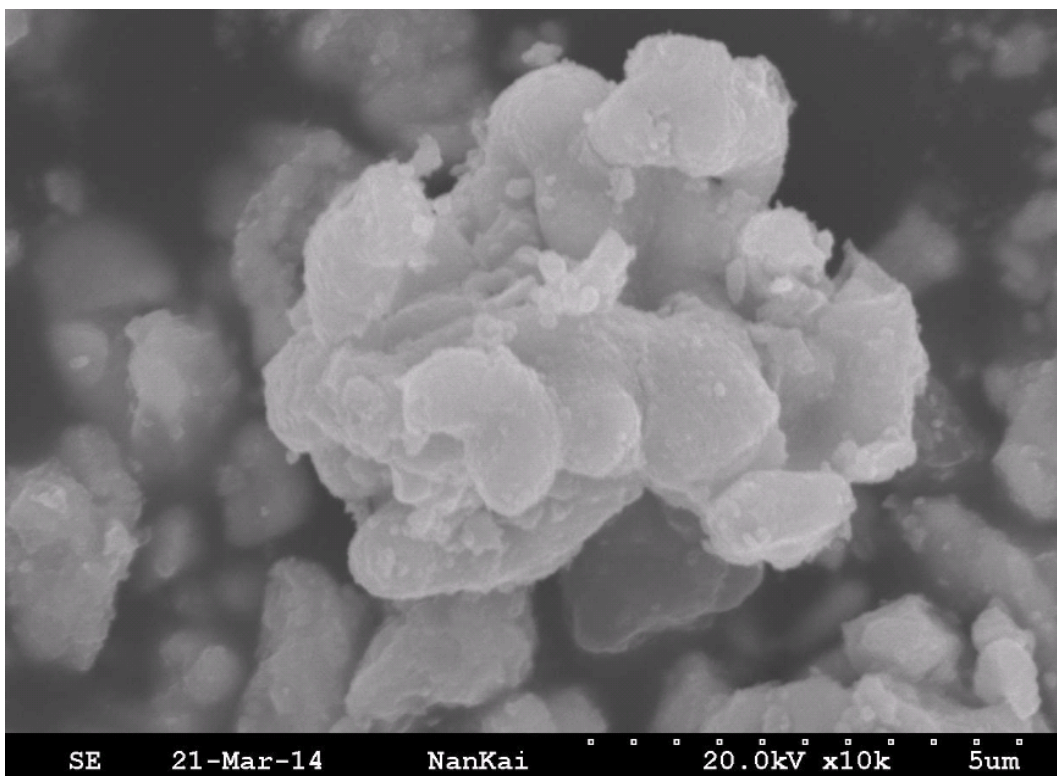

37

38 **Figure S4** SEM image of the as-prepared catalyst particles.

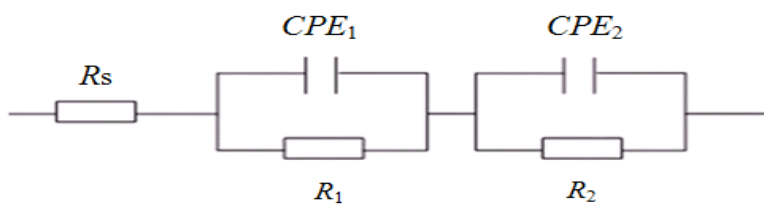

39

40 **Figure S5** Equivalent circuit used for fitting of the impedance.  $R_s$ : solution

41 resistance,  $R_1$ : ohm resistance,  $R_2$ : charge transfer resistance,  $CPE_1$  and  $CPE_2$ : constant

42 phase element.

43

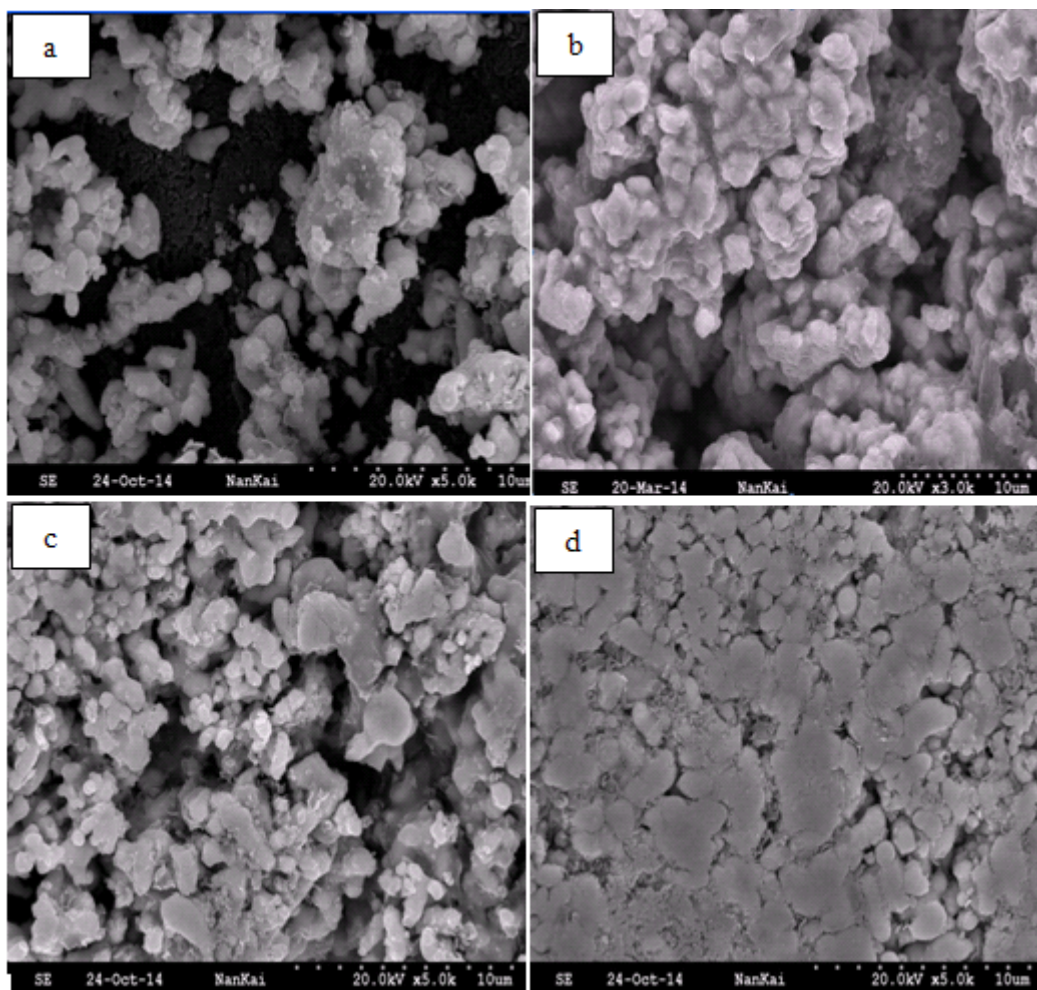

44

45 **Figure S6** SEM image of the SGDEs with different Sn loadings. (a) 3 mg cm<sup>-2</sup>, (b) 5  
46 mg cm<sup>-2</sup>, (c) 7 mg cm<sup>-2</sup> and (d) 9 mg cm<sup>-2</sup>.

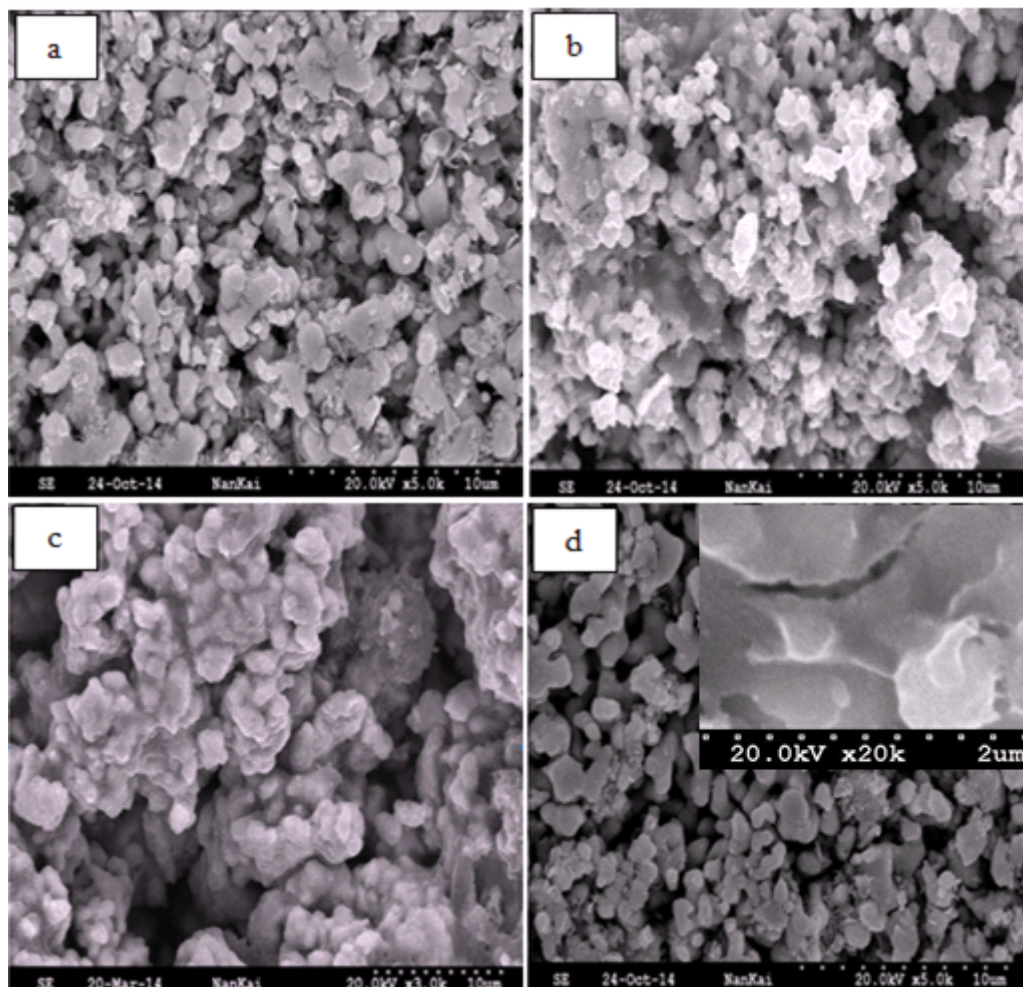

47

48 **Figure S7** SEM image of the SGDEs with different Nafion fractions. (a) 20 wt%, (b)  
49 33 wt%, (c) 50 wt% and (d) 60 wt%, the insert plot shows high-resolution SEM image  
50 of the SGDE with Nafion fraction of 60 wt%.

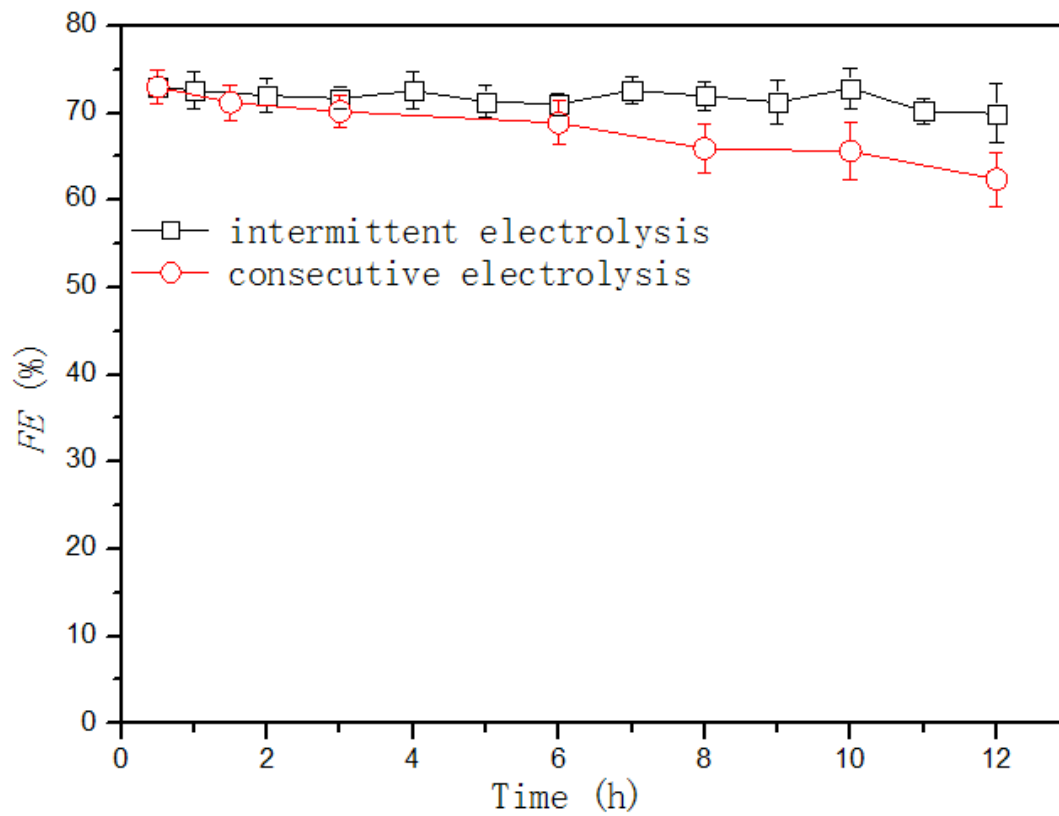

51

52 **Figure S8** The long term performance of ERCF with the optimal SGDE using two  
53 electrolysis models: consecutive electrolysis and intermittent electrolysis with 3 h in  
54 each run.
